# Supplementary material for: Effects of Population Dynamics on Establishment of a Restriction-Modification System in a Bacterial Host
Source: PubMed Central journal article supplement (PMC6337176; doi:10.3390/molecules24010198), 2019-01-07
Supplement: molecules-24-00198-s001.pdf [file molecules-24-00198-s001.pdf]

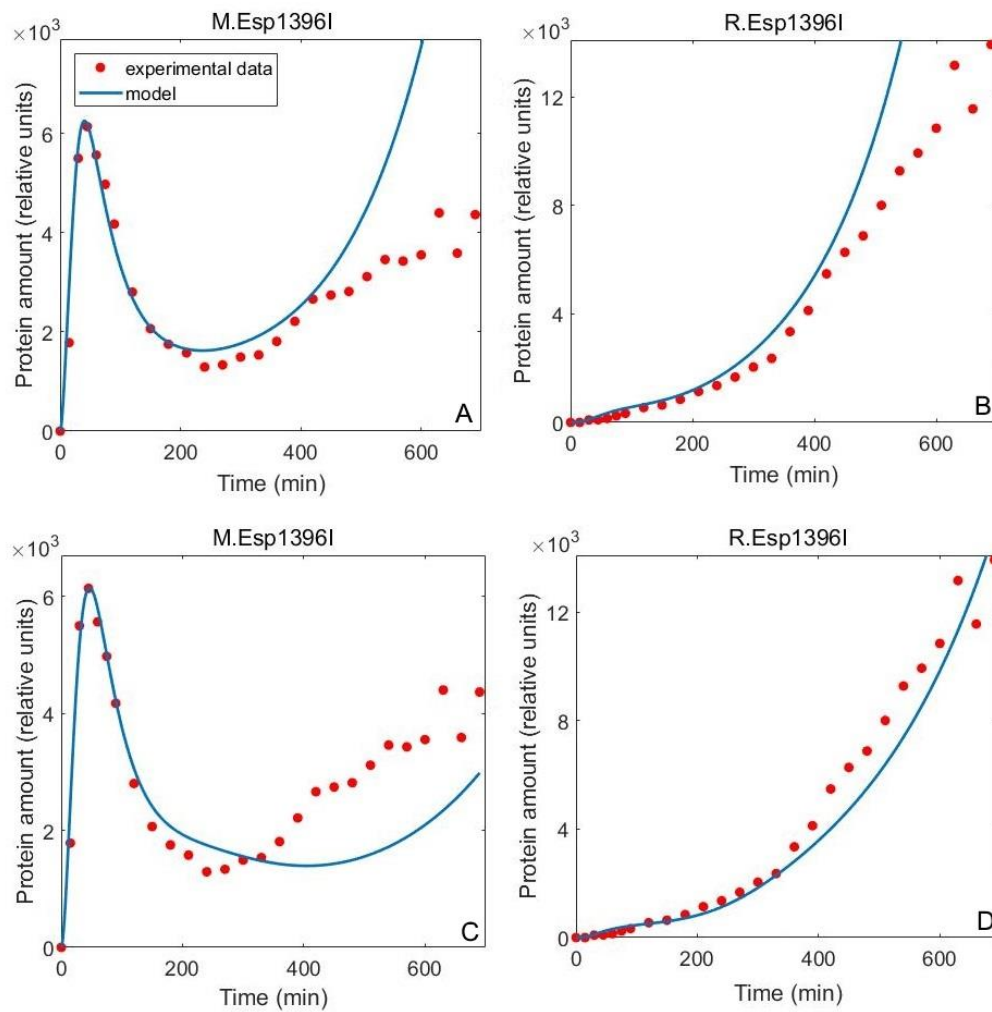

Figure S1 – Model with a single parameter describing plasmid division dynamics. (A) The single parameter describing plasmid division dynamics is assigned the value of the first plasmid division rate from the three-parameter model. The model including this assumption is simulated (blue curve) and compared to the data (red dots) (A) for methyltransferase, where F value for the comparison with the fit in Fig. 3A is 938 ( $P \sim 10^{-22}$ ), and (B) restriction endonuclease dynamics, with  $F=1782$  ( $P \sim 10^{-25}$ ) for comparison with the fit in Fig. 3B. (C) The model containing a single free parameter describing plasmid division dynamics is fitted to the experimental data for methyltransferase, with  $F=60$  ( $P \sim 10^{-9}$ ), and (D) restriction endonuclease dynamics, with  $F = 10$  ( $P \sim 10^{-3}$ ).

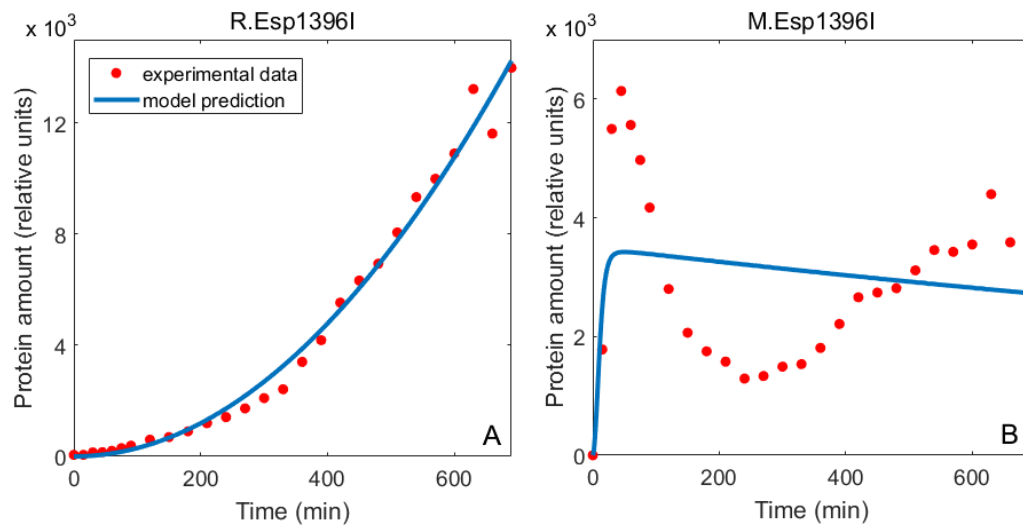

Figure S2 – Model ignoring population dynamics fitted to the experimental data for (A) restriction endonuclease and (B) methyltransferase expression dynamics.
